# Supplementary material for: Combined deletion of Glut1 and Glut3 impairs lung adenocarcinoma growth
Source: eLife. 2020 Jun 23;9:e53618. doi: 10.7554/eLife.53618 (PMC7311173; doi:10.7554/eLife.53618)
Supplement: Figure 1—figure supplement 2—source data 1. [file elife-53618-fig1-figsupp2-data1.xlsx]

## Sheet: Figure 1 - figure supplement 2a
Figure 1 - figure supplement 2a Immunohistochemistry (IHC) quantification of KP lesions from alveolar hyperplasia (AH) to grade 5 tumors shows percent of Glut1 staining defined as weak, intermediate or strong.
	Percent of KP tumors with a Glut1 staining				KP tumor grade	Weak Glut1 staining		Intermediate Glut1 staining		Strong Glut1 staining		TOTAL tumor number
Tumor grade	Weak	Intermediate	Strong			Tumor number	% of tumors	Tumor number	% of tumors	Tumor number	% of tumors
AH	90	10	0		AH	27	90	3	10	0	0	30
Grade 1	75	25	0		Grade 1	3	75	1	25	0	0	4
Grade 2	71	29	0		Grade 2	17	70.8333	7	29.1667	0	0	24
Grade 3	50	48	2		Grade 3	25	50	24	48	1	2	50
Grade 4	34	54	12		Grade 4	39	33.913	62	53.913	14	12.1739	115
Grade 5	0	80	20		Grade 5	0	0	4	80	1	20	5
