# Supplementary material for: Combined deletion of Glut1 and Glut3 impairs lung adenocarcinoma growth
Source: eLife. 2020 Jun 23;9:e53618. doi: 10.7554/eLife.53618 (PMC7311173; doi:10.7554/eLife.53618)
Supplement: Figure 1—source data 1. [file elife-53618-fig1-data1.xlsx]

## Sheet: Figure 1d
Figure 1d Graph with mean ± s.e.m. shows the fold changes of KP and KPG1 tumor volumes (n = 32 and 26, respectively) during 28 days by μCT, starting at 16 weeks and 6 days post-tumor initiation with tumor volume set to 1.
Data relative to the μCT scan done on 23.07.19
μCT date	Days elapsed	KP																																KPG1
		T1	T2	T3	T4	T5	T6	T7	T8	T9	T10	T11	T12	T13	T14	T15	T16	T17	T18	T19	T20	T21	T22	T23	T24	T25	T26	T27	T28	T29	T30	T31	T32	T1	T2	T3	T4	T5	T6	T7	T8	T9	T10	T11	T12	T13	T14	T15	T16
23.07.19	0	1	1	1	1	1	1	1	1	1	1	1	1	1	1	1	1	1	1	1	1	1	1	1	1	1	1	1	1	1	1	1	1	1	1	1	1	1	1	1	1	1	1	1	1	1	1	1	1
05.02.19	13	2.25	2.57	1.87	2.3	1.5	2.4	2.37	10.18	2.06	1.53	1.73	4.12	2.06	2.82	3.53	2.79	4.5	1.72	4.09	1.22	1.82	2.21	2.85	1.74	1.6	2.15	2.85	1.56	3.28	4.45	1.65	2.43	1.17	2.46	2.96	1.46	1.97	1.52	2.02	2.74	3.13	1.78	4.42	1.76	1.08	1.59	2.84	1.79
20.08.19	28	4.9	7	2.63	22.2	3.71	4.62	4.98	41.24	4.64	2.95	3.42	7.7	2.51	5.65	9.41	8.66	24.78	3.13	10.95	2.42	3.57	5.06	6.6	3.61	4.7	4.24	11.5	3.55	8.84	9.46	4.45	4.31	1.92	21.15	5.39	3.45	12	2.62	6.72	10.79	8.83	2.07	11.69	3.65	1.4	2.6	17.13	3.36
Tumor volume of each tumor
μCT date	Days elapsed	KP																																KPG1
		T1	T2	T3	T4	T5	T6	T7	T8	T9	T10	T11	T12	T13	T14	T15	T16	T17	T18	T19	T20	T21	T22	T23	T24	T25	T26	T27	T28	T29	T30	T31	T32	T1	T2	T3	T4	T5	T6	T7	T8	T9	T10	T11	T12	T13	T14	T15	T16
23.07.19	0	0.1054	0.4379	0.2985	0.7073	0.1581	0.1678	0.096	0.0985	0.536	1.4884	0.8933	0.087	0.2166	0.0762	0.3479	1.883	0.1218	0.3899	0.4521	0.4662	6.9718	1.4786	0.6974	5.8135	0.2499	1.4683	0.7678	0.4055	0.6599	0.4837	0.6923	0.6162	0.2731	0.0743	0.5131	0.2927	0.1742	0.5498	0.1012	0.187	0.1242	0.6819	0.7045	6.5512	3.0288	0.2184	1.3951	0.4124
05.02.19	13	0.237	1.1235	0.558	1.6286	0.2371	0.4026	0.2274	1.0027	1.1066	2.2836	1.5464	0.3586	0.4458	0.2151	1.2273	5.2566	0.5477	0.6723	1.8469	0.5672	12.7	3.268	1.9846	10.1	0.4009	3.1583	2.1851	0.6328	2.1649	2.1541	1.145	1.4995	0.3195	0.1829	1.5167	0.4278	0.3429	0.8342	0.2046	0.513	0.3884	1.2152	3.1154	11.5	3.2563	0.3479	3.9633	0.7392
20.08.19	28	0.5164	3.0634	0.7848	15.7	0.5863	0.7751	0.4784	4.062	2.4861	4.3925	3.0539	0.6699	0.5441	0.4304	3.2734	16.3	3.0177	1.2193	4.951	1.1278	24.9	7.4887	4.6018	21	1.174	6.2276	8.8326	1.4387	5.8347	4.5741	3.0794	2.6572	0.5252	1.5712	2.7643	1.0091	2.091	1.4422	0.68	2.0175	1.0964	1.4126	8.2365	23.9	4.2408	0.5686	23.9	1.3855
[truncated: 10 more columns]

## Sheet: Figure 1g
Figure 1g Percent of KP (n = 128) and KPG1 (n = 102) lesions classified by tumor grades, either detailed from alveolar hyperplasia (AH) to grade 5 or discriminated between alveolar hyperplasia and adenomas, and adenocarcinomas. Alveolar hyperplasia and adenomas include the AH and the tumor grades 1, 2, and 3. Adenocarcinomas contain the tumor grades 4 and 5.
Left part of the figure AH, Grade1, Grade 2, Grade 3, Grade 4, Grade 5										KP				KPG1
	Percent of [%]									Tumor number per tumor grade	% of tumor number	Tumor number per tumor grade	% of tumor number	Tumor number per tumor grade	% of tumor number	Tumor number per tumor grade	% of tumor number
	AH	Grade 1	Grade 2	Grade 3	Grade 4	Grade 5		Alveolar Hyperplasia & Adenoma	AH	2	1.5625	56	43.75	4	3.92157	64	62.7451
KP	2	2	5	35	50	6			Grade 1	3	2.34375			3	2.94118
KPG1	4	3	10	46	34	3			Grade 2	6	4.6875			10	9.80392
									Grade 3	45	35.1562			47	46.0784
Right part of the figure Alveolar Hyperplasia & Adenoma (AH, Grade1, Grade 2, Grade 3) and Adenocarcinoma (Grade 4, Grade 5)								Adenocarcinoma	Grade 4	64	50	72	56.25	35	34.3137	38	37.2549
	Percent of [%]								Grade 5	8	6.25			3	2.94118
	Alveolar Hyperplasia & Adenoma	Adenocarcinoma							TOTAL	128	100	128	100	102	100	102	100
KP	44	56
KPG1	63	37

## Sheet: Figure 1h
Figure 1h Kaplan-Meier survival analysis of KP (n = 8) and KPG1 (n = 6) mice.
Genotype	Mouse ID	Days elapsed	KP	KPG1
KP	EME-019820	178	1
	EME-019849	177	1
	EME-019821	178	1
	EME-019822	167	1
	EME-019823	167	1
	EME-019824	154	1
	EME-019827	196	1
	EME-019850	162	1
KPG1	EME-019946	226		1
	EME-019948	167		1
	EME-019950	198		1
	EME-019951	164		1
	EME-019953	215		1
	EME-019955	189		1
