# Supplementary material for: Combined deletion of Glut1 and Glut3 impairs lung adenocarcinoma growth
Source: eLife. 2020 Jun 23;9:e53618. doi: 10.7554/eLife.53618 (PMC7311173; doi:10.7554/eLife.53618)
Supplement: Figure 3—figure supplement 1—source data 1. [file elife-53618-fig3-figsupp1-data1.xlsx]

## Sheet: Figure 3 - figure supplement 1a
Figure 3 - figure supplement 1a Freshly-isolated tumor-derived cells were placed in a Seahorse XF analyzer and subjected to longitudinal extracellular acidification rate (ECAR) measurements. Glucose or 2-deoxyglucose (2-DG) were added where indicated. Data are means ± s.e.m. of 3 KP and 3 KPG1 tumor-derived cells each analysed in ten technical replicates. We excluded the negative value from the a…
Seahorse
Measurements	Extracellular acidification rate (ECAR) [mpH/min]
	KP																														KPG1
	T1										T2										T3										T1										T2
1	6.61744	4.39776	3.81737	5.52661	6.53491	4.36904	4.63415	6.20464	3.40814	3.30011	7.96266	5.42932	6.17117	7.20957	6.05055	8.62193	2.78332	2.74283	3.66678	1.42016	6.21793	4.83457	5.57465	6.56571	1.46565	6.68449	5.585	6.30333	4.78999	2.45808	1.64115	5.75653	4.78448	3.83033	5.05699	5.74941	6.63441	6.69379	4.06696	3.06492	4.64393	4.1251	3.07244	2.67853	2.90067	2.1549	3.05079	3.28495	2.80283
2	6.06835	4.81934	3.89988	6.14039	9.05974	5.73569	5.35959	8.24311	4.06387	3.84441	7.19501	5.59678	5.73513	7.24316	6.34525	8.89043	3.01575	2.85536	3.9755	1.44918	5.25344	3.8538	5.76367	6.1282	2.63382	7.3109	5.92999	7.77649	4.75882	2.94733	1.7718	7.26229	6.68559	5.41	6.84658	7.51797	8.36595	8.10985	5.21439	3.85604	5.31722	5.62032	5.32561	4.79871	3.54445	2.77401	3.00297	4.2037	3.25335
3	5.41139	4.13345	2.86714	4.85396	7.70529	5.0175	4.55415	6.55477	3.26718	3.19226	6.80344	5.42758	5.79196	6.88032	6.0992	9.32506	3.12395	2.76899	4.24538	1.53861	5.10792	4.63891	5.30029	6.07026	2.39534	7.75736	6.02951	7.82777	4.91243	3.02025	1.62602	7.38183	6.58836	5.65287	6.41188	7.38366	7.82714	7.11477	4.90025	3.17797	4.98937	5.05255	4.57343	4.32565	3.21725	2.30339	2.45879	4.02979	3.22349
4	5.02119	3.88387	3.0733	5.21754	7.29194	5.01595	4.44542	6.93571	3.40666	3.64949	7.53406	6.41143	7.0327	8.35909	7.3266	10.2537	3.45472	3.44369	4.64521	1.78696	5.50769	5.05027	6.02417	7.59803	3.38946	8.53571	7.03062	8.80607	5.54864	3.36749	1.75101	7.63258	7.13889	5.63451	7.14356	7.38471	8.36587	8.57605	5.15515	3.55511	5.04035	5.74753	5.58485	5.10652	3.97644	3.38114	3.2897	4.58106	3.65475
5	4.85067	3.46623	2.76998	4.38133	6.3739	4.32657	3.51721	5.69435	2.98276	2.98841	7.37807	6.15038	6.99054	8.39471	7.02568	10.3208	3.42056	3.25211	4.79147	1.83552	5.21324	5.03813	5.83465	7.34575	3.44721	8.00288	6.96003	8.67656	5.08405	3.38109	1.59255	7.10239	6.42764	5.1531	6.80954	7.17492	7.86498	7.4959	4.91779	2.86227	4.8944	5.21275	5.1889	4.32696	3.46715	3.01375	2.79067	4.13896	3.38428
6	16.0449	8.96968	14.1566	19.4019	17.982	12.3125	21.8891	13.5038	10.2147	13.4476	32.7759	28.3547	31.1448	41.5162	25.4234	40.8613	16.3025	11.1465	18.6446	4.43903	23.5496	42.3047	39.3845	43.5554	29.0218	25.3432	57.1434	12.359	9.09921	17.4799	2.82063	2.71706	8.34336	6.13952	3.322	8.20696	14.0987	6.57591	2.82173	2.80528	5.66407	5.27563	6.25379	6.29734	5.19408	5.5109	6.31278	6.18104	5.26673
7	16.4786	8.98032	13.8504	19.8875	18.4141	11.8562	21.46	13.973	10.482	13.0133	34.0164	29.549	31.3221	45.6187	25.719	43.3053	16.0243	11.0663	19.7042	3.4547	27.4137	49.2311	42.4454	48.8643	17.817	22.6145	65.9047	9.26524	11.0986	18.0443	2.52487	3.1852	6.13839	4.51917	4.82951	8.5241	12.5519	5.39839	2.19021	1.62071	5.48116	5.51658	5.59535	6.02451	4.35637	4.76471	5.43815	5.46517	5.09154
8	15.7776	8.81608	13.3505	18.9831	17.4305	10.5377	20.3639	13.1083	10.1482	12.6518	33.7449	30.2808	31.0955	47.545	25.9183	43.8987	15.3382	10.8578	20.4367	3.26537	28.351	52.4368	43.1953	49.6622	4.94679	21.4879	68.0979	9.21335	10.8465	17.8878	2.45439	4.27277	6.22428	4.44239	4.18272	8.52573	11.3345	6.44568	2.62512	1.46557	4.82762	5.34845	5.49367	5.62074	4.3521	4.89843	4.15338	5.36332	4.33075
9	14.3862	7.48385	11.5479	15.9054	14.8123	9.2482	17.9491	13.5098	9.2987	11.2293	32.1171	28.8146	30.0511	48.1947	24.104	42.0731	12.7508	10.5389	18.7221	3.07671	28.455	53.6168	41.6972	49.1116	5.21617	18.1964	72.4387	9.20456	7.37514	16.3938	2.25314	4.57921	4.96831	2.48747	4.10889	5.85783	9.63499	5.85013	2.72619	1.0525	4.40684	4.80958	4.93712	5.01678	3.74055	4.01186	3.88483	4.64796	4.14559
10	13.5201	6.79903	10.6669	14.8766	13.3462	8.13806	16.7734	12.7472	8.49641	10.5017	30.5538	27.6998	27.8651	47.0264	22.7657	40.104	11.7205	10.0106	18.2526	2.87324	27.1462	52.7389	40.5717	48.1287	4.94435	17.582	65.7322	8.47528	6.60837	15.2787	2.08876	3.59133	4.49243	2.75435	4.02609	5.56538	9.73297	5.81729	3.07048	1.23936	4.22543	4.66713	4.28373	4.11876	3.17306	3.5922	3.5341	3.63716	3.73413
11	2.01073	1.00808	0.745166	1.46273	2.74216	1.42805	2.01168	1.8202	0.484739	0.478921	3.90899	3.63357	2.99117	7.95178	3.75052	8.56754	1.86977	1.12001	1.58689	0.897689	5.97528	7.52542	6.26542	1.94936	0.518679	2.90211	3.2018	3.77477	1.09374	2.55187	0.902659	0.571148	0.892871	0.983654	1.56875	0.714942	1.18142	4.53354	0.94612	0.548026	1.32375	0.426429	2.15543	0.880501	0.032003	0.274772	0.799431	0.576014	0.82818
12	1.59003	0.893128	0.447624	0.988763	2.95518	1.19777	1.78805	1.60141	0.5017	0.475855	3.33243	2.78726	3.1157	6.56808	3.02784	7.07235	1.86574	0.835715	1.68002	0.606117	5.10192	6.10447	5.75756	2.61975	0.244435	2.58274	2.73708	3.25503	0.95713	2.07234	0.735557	0.563452	1.3034	1.21196	1.55078	0.446733	1.11522	4.78672	0.791451	0.256578	1.68024	0.498723	2.1748	0.712546	0.076804	0.216789	0.428335	0.128242	0.954209
13	1.39978	0.739339	0.306086	0.398434	2.58109	1.13312	1.47528	1.40384	0.331662	0.447564	2.61267	2.46135	2.43692	6.08146	2.88203	6.80752	1.75651	0.767399	1.43122	0.432982	4.38503	5.09274	4.85308	2.1953	-0.214486*	1.79162	2.20226	2.47005	0.63226	1.97149	0.48192	1.18744	0.766996	1.05357	1.41673	0.444695	1.15228	4.1237	0.573242	0.078565	0.926127	0.26521	1.91743	0.776315	0.038353	0.125877	0.532143	0.841115	1.12613
[truncated: 11 more columns]
