# Supplementary material for: Combined deletion of Glut1 and Glut3 impairs lung adenocarcinoma growth
Source: eLife. 2020 Jun 23;9:e53618. doi: 10.7554/eLife.53618 (PMC7311173; doi:10.7554/eLife.53618)
Supplement: Figure 3—figure supplement 3—source data 1. [file elife-53618-fig3-figsupp3-data1.xlsx]

## Sheet: Figure 3 - figure supplement 3c
Figure 3 - figure supplement 3c Graph with mean ± s.e.m. shows the fold changes of KP, KP-PPAR⍺Δ13, KPG1 and KPG1-PPAR⍺Δ13 (n = 11, 16, 11 and 8) tumor volumes monitored during 23 days by μCT, before and during doxycycline diet, starting at 22 weeks and 4 days post-tumor initiation with tumor volumes set to 1. Data written in blue are the data during doxycline diet.
Data relative to the μCT scan done on 11.12.18
μCT date	Days elapsed	KP											KP PPAR⍺Δ13																KPG1											KPG1 PPAR⍺Δ13
		T1	T2	T3	T4	T5	T6	T7	T8	T9	T10	T11	T1	T2	T3	T4	T5	T6	T7	T8	T9	T10	T11	T12	T13	T14	T15	T16	T1	T2	T3	T4	T5	T6	T7	T8	T9	T10	T11	T1	T2	T3	T4	T5	T6	T7	T8
11.12.18	0	1	1	1	1	1	1	1	1	1	1	1	1	1	1	1	1	1	1	1	1	1	1	1	1	1	1	1	1	1	1	1	1	1	1	1	1	1	1	1	1	1	1	1	1	1	1
20.12.18	9	1.58	2.91	2.52	2.7	1.32	2.51	1.19	1.37	1.59	2.6	1.19	2.52	3.37	1.8	2.2	1.75	1.92	1.47	1.04	1.85	1.21	1.79	1.38	1.34	1.6	1.62	1.78	2.66	1.33	1.93	1.74	2.08	1.34	1.33	1.56	1.07	1.1	1.07	2.57	2.08	1.7	2.02	1.78	1.81	1.08	1.09
27.12.18	16	2.58	6.35	5.59	6.6	1.75	4.66	2.28	2.11	2.16	3.59	1.27	4.03	4.85	2.55	3.85	1.94	2.85	1.94	1.16	2.72	1.52	3.16	1.73	2.54	2.47	2.63	2.53	3.64	1.54	3.94	2.87	3.7	2.44	1.79	2.14	1.2	1.54	1.46	4.97	3.65	1.96	3	2.78	2.97	1.47	1.97
03.01.19	23	2.85	11.31	8.65	11.3	2.08	7.83	3.7	3.79	3.12	4.07	1.48	4.75	6.17	2.85	6.1	2.49	4.41	2.3	1.43	4.28	1.75	5.37	2.29	4.29	3.57	3.99	3.59	4.39	2.34	6.44	4.76	5.18	5.54	2.31	4.71	1.45	1.87	1.7	6.15	5.04	3.04	3.62	3.83	3.82	1.78	2.59
Tumor volume of each tumor
μCT date	Days elapsed	KP											KP PPAR⍺Δ13																KPG1											KPG1 PPAR⍺Δ13
		T1	T2	T3	T4	T5	T6	T7	T8	T9	T10	T11	T1	T2	T3	T4	T5	T6	T7	T8	T9	T10	T11	T12	T13	T14	T15	T16	T1	T2	T3	T4	T5	T6	T7	T8	T9	T10	T11	T1	T2	T3	T4	T5	T6	T7	T8
11.12.18	0	2.6086	0.6054	4.8874	0.2779	0.2055	1.2571	0.2226	0.1604	1.9665	0.1071	1.4046	1.1217	0.14	0.2793	0.1415	0.8217	1.4837	1.0549	1.9482	6.5883	1.0284	2.8318	0.0999	0.2108	0.5024	2.9855	0.5987	0.3389	1.0218	0.1178	7.9783	1.2857	0.9389	1.4611	0.505	0.175	0.3392	0.392	0.5364	6.5489	0.2172	1.0871	7.3051	4.3772	1.3636	1.0896
20.12.18	9	4.1199	1.7641	12.3	0.7517	0.2718	3.1556	0.2646	0.2205	3.1217	0.2781	1.6751	2.8317	0.4722	0.5025	0.3112	1.44	2.8493	1.547	2.0311	12.2	1.2468	5.055	0.1377	0.2831	0.8036	4.8471	1.0629	0.9025	1.3623	0.2271	13.9	2.6728	1.2552	1.9404	0.7867	0.1876	0.3741	0.4188	1.3791	13.6	0.3702	2.1975	13	7.9155	1.4784	1.1861
27.12.18	16	6.7179	3.8438	27.3	1.8334	0.3592	5.8577	0.5085	0.3385	4.2425	0.3847	1.7847	4.5253	0.6783	0.7131	0.5446	1.5912	4.223	2.0428	2.2505	17.9	1.5674	8.961	0.1725	0.5354	1.2387	7.8408	1.5142	1.2329	1.5753	0.4641	22.9	4.7548	2.2934	2.612	1.0804	0.2095	0.5226	0.5712	2.6682	23.9	0.4255	3.2645	20.3	13	2.011	2.1514
03.01.19	23	7.4387	6.8462	42.3	3.1401	0.4283	9.8424	0.8228	0.6083	6.1361	0.4357	2.0807	5.3243	0.8636	0.7968	0.8628	2.0487	6.542	2.4242	2.7813	28.2	1.7975	15.2	0.2283	0.9041	1.7944	11.9	2.1493	1.4883	2.3902	0.7581	38	6.6556	5.199	3.377	2.3788	0.2546	0.6333	0.6651	3.2964	33	0.6607	3.9371	28	16.7	2.4252	2.8254
