# Supplementary material for: Combined deletion of Glut1 and Glut3 impairs lung adenocarcinoma growth
Source: eLife. 2020 Jun 23;9:e53618. doi: 10.7554/eLife.53618 (PMC7311173; doi:10.7554/eLife.53618)
Supplement: Figure 3—source data 1. [file elife-53618-fig3-data1.xlsx]

## Sheet: Figure 3a
Figure 3a Tumor-derived single cell preparations were placed in a Seahorse XF analyzer and subjected to longitudinal extracellular acidification rate (ECAR) measurements. Glucose or 2-deoxyglucose (2-DG) were added where indicated. Data are means ± s.e.m. of 3 KP and 3 KPG1 tumor-derived single cells each analysed in ten or five technical replicates. The data from the outlier KPG1 is shown separa…
Seahorse
Measurements	Extracellular acidification rate (ECAR) [mpH/min]
	KP																									KPG1																				KPG1 "outlier"
	T1										T2										T3					T2										T3										T1
1	7.28812	8.37999	9.57073	8.91355	6.38135	5.02555	5.90929	8.76042	7.08101	5.24202	10.3163	6.31979	6.13891	7.73039	6.76966	15.4014	3.20144	5.77053	6.18661	4.12883	11.2085	3.41912	5.67877	5.60392	3.12195	8.61279	5.23398	7.05098	3.96064	6.65305	4.28203	8.44605	5.05988	7.18571	2.32725	4.87947	4.64048	2.78754	7.51533	1.91976	4.25749	1.96263	4.81219	0.843424	5.43945	12.5449	14.4298	11.3948	11.6848
2	13.2369	10.414	9.23925	11.3827	11.3247	6.54438	6.66458	9.33827	10.585	8.32296	13.8915	9.54089	8.0369	10.1933	7.70477	14.5162	4.14441	7.53385	8.53401	7.42943	14.4659	6.31939	10.7081	5.79108	6.8031	9.97833	5.81375	9.40477	6.14692	9.08961	5.53827	8.72653	7.59898	7.98959	2.67279	9.08737	5.58223	4.45578	8.70863	3.80838	5.1787	1.34171	5.71692	2.92411	4.21477	18.2046	18.1739	13.8267	13.5481
3	13.7104	10.3474	11.1835	11.4498	11.1444	6.959	6.20655	10.5131	11.9054	7.85751	13.5571	11.6245	9.09495	12.1009	7.49	15.4589	4.4169	7.42341	8.0569	8.25383	16.3521	7.49505	12.7766	7.67	7.84861	8.73166	4.9073	7.34699	6.4864	8.32043	4.20716	8.22178	6.03521	6.76061	1.53156	9.72234	5.43022	4.82144	9.35079	3.85831	5.78754	1.48152	4.70467	2.74795	3.93949	15.7615	17.5316	13.5171	11.2332
4	14.2816	9.35122	10.2688	13.1507	10.8733	6.37539	5.9465	10.5489	11.7654	7.33295	13.9081	12.3191	9.34512	11.3394	7.64304	16.5433	4.6835	8.23873	7.38846	7.86865	17.412	7.58169	12.8667	8.83692	8.40842	6.74187	4.07227	7.5504	5.44733	6.62701	3.85115	7.4575	5.00186	6.52286	0.853738	10.2038	6.31119	6.74407	9.7368	4.403	5.99278	0.787234	5.36234	2.78524	2.71315	14.8222	16.4973	11.4705	9.57293
5	12.8282	9.36049	9.95258	11.1135	10.5468	7.15974	5.85243	10.3643	12.1893	6.5591	13.9741	12.6112	8.32053	11.2128	7.60966	13.1341	4.55164	6.56838	6.95311	7.36297	14.9641	7.64842	11.7125	8.51976	8.41552	5.97481	3.55111	5.91181	4.69635	5.91054	3.21266	6.76659	5.02566	5.59247	0.102397	9.57965	5.79517	6.43103	9.6033	3.72385	6.15304	1.78438	5.2425	2.79437	2.75127	12.209	14.0865	9.72285	8.01997
6	17.0667	7.49953	17.4221	21.5867	25.4279	8.07943	11.0428	8.58007	11.4028	8.2127	11.6044	12.9927	9.19475	22.8917	12.7496	8.85782	4.37442	13.506	7.4827	13.7344	27.6477	8.10407	22.3835	16.8933	11.0699	4.30299	2.64992	10.2713	4.04978	5.95475	6.33489	4.88103	3.70252	5.41517	1.0176	10.7754	7.22718	8.08062	10.9623	7.4719	10.4408	2.23426	13.2703	1.98501	6.91026	35.266	21.0181	32.4012	37.3456
7	10.6333	4.43188	12.8664	13.7322	25.3117	6.07104	8.46126	5.28218	9.46043	1.90649	10.0387	6.86552	7.71021	15.1931	10.8632	5.0396	3.33596	10.2233	4.82556	10.23	23.2931	5.12821	12.7162	16.7907	6.86601	3.11485	3.31609	2.86597	4.59502	5.56137	4.89415	5.26962	3.6577	4.60153	1.02735	5.57135	5.22822	3.96983	4.64491	4.19869	9.05494	2.26256	9.61351	1.19737	6.15309	35.2417	20.3819	9.30383	36.1696
8	5.63464	3.10611	7.44217	9.15663	26.0874	6.1592	6.87192	6.63148	7.64651	4.15482	6.70935	6.8357	8.63603	11.9846	9.03987	7.3844	4.38946	3.29816	6.52201	5.90622	13.9199	4.94261	15.2874	16.616	4.09818	3.47658	2.45359	3.74108	4.66535	5.32045	5.21406	5.08003	4.92188	4.95674	1.69869	2.65051	4.29438	2.61621	5.18898	3.82043	8.03324	-0.007152*	9.04142	1.4057	5.80029	35.2881	18.6981	9.91382	20.1412
9	4.44785	2.99924	5.98811	6.93701	24.2025	3.78687	7.32161	6.81915	6.67327	4.10375	7.14051	8.9433	9.77676	10.8382	5.60128	8.19332	3.21502	2.19811	9.73167	4.67805	15.8011	2.74569	15.7363	16.1007	4.95933	3.41019	2.47259	3.79099	5.23994	4.93636	4.80786	4.79175	4.24195	5.43628	0.862566	3.37234	4.16898	3.4804	3.55532	2.98562	7.68507	-0.305065*	7.27511	0.961047	3.86795	31.1311	17.4042	7.70211	16.7132
10	4.40976	3.97029	8.84217	6.53889	22.8526	0.575817	7.41423	5.13405	8.1445	3.57447	3.61	5.34349	8.59508	9.31009	5.3573	6.13281	3.33211	2.84609	5.42738	3.83466	14.6867	3.14845	13.5694	14.6348	3.96235	2.323	1.95683	2.11123	3.70099	3.81211	3.96875	4.87484	4.70163	5.55213	0.141686	2.29595	3.09935	1.49139	3.1402	2.38816	6.96822	-0.626812*	4.91437	1.95697	3.33212	29.6518	14.6785	5.90444	14.1233
11	3.93052	4.03568	8.4307	5.09136	20.3974	1.5798	5.88385	3.85864	6.78057	4.1918	2.7708	5.34441	8.41278	9.55413	3.23692	5.46873	2.6621	2.30105	5.16609	3.22945	12.7484	2.90842	13.7327	14.0775	3.75029	2.90712	1.90257	4.06145	4.13316	4.11154	3.09197	3.74492	3.38252	5.69492	-0.09179*	2.58327	3.64331	2.73636	3.03079	1.54064	5.47877	-0.336232*	3.95479	0.808706	3.12141	27.4021	12.8666	6.91015	12.9034
12	1.99921	1.80511	0.017675	1.52092	1.82048	1.09219	0.920071	1.45844	3.3095	-0.090155*	2.0618	0.769771	1.97121	4.54327	1.03299	0.291754	0.456714	0.604593	0.867823	0.715233	3.99936	0.562758	2.24342	1.40066	1.99487	0.951299	0.858911	1.89471	1.54981	1.88601	2.01424	1.14162	1.90719	0.765624	-0.291477*	0.425326	1.18864	2.11296	0.895359	0.60264	1.44101	-0.044723*	0.338965	0.446466	-0.442009*	2.62997	3.2855	1.62146	2.91397
13	2.06613	2.55876	1.88813	1.56517	1.38604	1.49563	1.07151	1.28708	2.5375	-0.338047*	2.86131	1.2115	1.64452	3.9784	0.554492	0.672386	0.355791	0.849152	0.722724	0.2498	3.18276	1.17102	2.33725	0.832454	1.58834	0.739164	0.853905	0.80581	1.37171	1.52652	2.11901	0.714982	1.47228	-0.394972*	-0.392147*	1.64778	1.94747	1.44489	1.129	0.437758	1.43117	0.346656	0.940757	-0.011375*	-0.48792*	2.94992	3.00127	1.14923	2.0443
14	2.35037	-0.156386*	1.32947	0.924922	1.48789	0.826332	1.16376	1.29891	2.64253	0.073242	0.744323	0.874387	1.35496	2.8708	0.821945	1.11792	0.302469	0.80297	-0.249892*	0.574169	2.86794	1.20184	1.04678	1.15089	1.36387	1.29669	0.110822	0.355419	1.57658	0.847509	1.90909	0.238111	1.04946	-0.068757*	-0.031104*	2.46172	0.481548	2.17651	1.04228	1.08237	1.96797	1.10512	0.783684	-0.104509*	0.070256	2.79232	1.73177	1.44619	2.12801
Relative mRNA expression
Relative Glut1 mRNA expression	KP		KPG1
	T1	8.17204	T1	3.98381
	T2	12.5755	T2	1.58014
	T3	11.6244	T3	2.73941
Relative Glut3 mRNA expression	KP		KPG1
	T1	0.716316	T1	4.47772
	T2	0.15656	T2	0.562944
	T3	0.356347	T3	0.395631
[truncated: 6 more columns]
