# Supplementary material for: Combined deletion of Glut1 and Glut3 impairs lung adenocarcinoma growth
Source: eLife. 2020 Jun 23;9:e53618. doi: 10.7554/eLife.53618 (PMC7311173; doi:10.7554/eLife.53618)
Supplement: Figure 4—figure supplement 2—source data 1. [file elife-53618-fig4-figsupp2-data1.xlsx]

## Sheet: Figure 4 - figure supplement 2a
Figure 4 - figure supplement 2a Graph with mean ± s.e.m. shows the fold changes of KP and KPG3 tumor volumes (n = 7, respectively) during 56 days by μCT, starting at 16 weeks post-tumor initiation with tumor volume set to 1.
Data relative to the first μCT scan
μCT date	Days elapsed	KP							KPG3
		T1	T2	T3	T4	T5	T6	T7	T1	T2	T3	T4	T5	T6	T7
CT1	0	1	1	1	1	1	1	1	1	1	1	1	1	1	1
CT2	28	1.82143	2.56757	5.33333	1.96154	0.842105	0.991379	6.61905	1.44286	2.33333	1.79503	5.57895	2.48126	1.90476	1.9023
CT3	56	20.1071	33.027	21.2222	40.2308	3.83041	2.50862	79.0794	3.64286	29.55	3.92547	76.8947	38.0513	6.83333	5.39655

## Sheet: Figure 4 - figure supplement 2b
Figure 4 - figure supplement 2b Freshly-isolated tumor-derived cells were placed in a Seahorse XF analyzer and subjected to longitudinal extracellular acidification rate (ECAR) measurements. Glucose or 2-deoxyglucose (2-DG) were added where indicated. Data are means ± s.e.m. of 4 KP and 2 KPG3 tumor-derived cells each analysed in ten technical replicates. We excluded the negative values from the …
Seahorse
Measurements	Extracellular acidification rate (ECAR) [mpH/min]
	KP																																								KPG3
	T1										T2										T3										T4										T1
1	0.115877	-0.8799849*	-1.523841*	0.969422	-0.1834902*	0.156537	-0.9085847*	-0.01747082*	-0.4311297*	-0.4447979*	2.59424	3.21698	2.17501	2.5139	1.64249	2.47907	1.71634	2.96661	2.26487	2.35428	4.10178	4.80044	4.30176	2.46796	3.44291	3.7937	4.08491	2.67467	1.49106	2.42248	0.387972	-1.5753*	-2.546262*	-2.145362*	-5.620014*	-1.132261*	-0.7329713*	-1.948834*	-0.948935*	1.74797	4.31975	2.28245	5.0444	5.18086	2.34928	3.0768	1.32236	1.83594	2.5152
2	3.2695	1.01487	1.022	3.79366	1.2137	2.41562	-0.430756*	1.43472	0.828626	1.47663	3.52156	6.38095	3.31192	4.16576	4.59837	5.80274	2.57431	6.52698	5.37906	3.49518	8.43025	7.23153	6.7699	6.48057	4.88993	5.72614	4.06166	4.38897	3.57212	3.37985	-0.05927121*	-1.297037*	-1.863711*	-2.361545*	-3.819184*	0.106838	-0.7204652*	-0.8447198*	-0.9960583*	-0.5050108*	9.0225	6.33152	9.47199	10.4089	5.84499	5.23676	4.13557	7.36858	3.86813
3	4.34518	2.58854	2.22215	4.72419	3.4554	3.81764	0.737558	2.54899	2.66623	3.26807	3.48646	6.81227	2.98784	4.03827	5.25256	5.66536	2.46285	5.67457	5.14071	3.83006	9.61251	7.40373	5.28347	7.47436	5.07562	6.14096	4.40307	5.1266	4.22737	3.42797	2.13083	1.4871	-0.6110033*	-0.9979543*	-1.909513*	2.30476	-0.3236522*	1.03809	-0.3386133*	1.15421	9.52245	7.77527	8.38512	8.09378	6.30538	4.67535	5.43764	7.73713	4.55131
4	4.84028	3.72064	3.66152	4.70351	3.79174	4.32406	2.19126	3.16118	3.12419	3.91155	3.27692	6.20193	3.34528	4.02809	5.45694	5.46275	2.2035	5.37661	4.54758	3.26861	11.0684	7.75808	6.98754	7.89118	5.15935	5.74064	4.98088	5.39171	5.05552	3.70801	3.11004	2.01296	0.533693	-0.02179064*	-0.7353671*	3.56312	1.55283	1.87345	0.521209	3.37709	9.08939	8.76521	8.67567	8.79322	5.99248	4.33982	6.17759	6.58691	4.34593
5	5.35341	4.18808	3.40278	4.13665	4.25186	4.52684	2.73966	3.34798	3.03584	4.01181	3.48563	5.56346	2.93892	3.51846	4.75419	5.37835	1.8933	4.57474	3.91068	2.87704	10.316	7.11953	6.41813	7.14898	4.85644	5.67606	4.20091	5.13503	4.88409	2.95611	4.0004	2.60113	1.28431	0.448488	1.13878	4.28982	1.85531	2.42206	0.78258	4.9294	8.65703	7.60503	7.88083	7.7846	5.11411	4.07662	5.1409	6.23465	4.11802
6	12.71	13.0204	10.2912	11.5394	9.93479	8.15181	7.91714	9.17951	9.18253	8.22321	9.47048	16.8696	8.27579	11.8828	13.6249	16.1202	6.74033	10.857	10.3699	7.8259	25.2092	21.6702	18.2918	24.6801	19.006	19.4686	19.7821	15.359	17.4071	11.4232	5.33014	6.69963	7.96614	5.74832	6.68862	7.21723	5.25721	6.08366	3.88945	8.69632	17.0345	18.8601	18.7946	15.959	10.452	12.5757	17.097	13.2226	7.91205
7	11.9136	12.7224	9.77491	10.3367	9.10467	8.17866	7.74006	8.20657	8.64469	7.86901	9.67496	18.4772	8.9487	12.5846	13.8337	16.4031	7.17733	11.6884	12.1862	8.85521	26.4098	22.4518	18.0684	25.1717	18.8687	20.3414	20.6269	15.9783	17.7566	11.7703	6.75255	6.03209	7.92093	4.84891	5.44632	6.76743	5.42994	5.70011	3.75651	9.44317	18.7044	21.1884	20.0337	15.877	11.3453	13.5957	19.7566	13.7586	8.77642
8	11.2804	11.9389	9.4594	9.77065	8.79988	8.2457	7.45208	8.07097	8.00329	8.55075	9.75381	18.4434	9.40584	12.6528	14.2015	16.9047	7.14579	11.911	12.472	9.32915	24.8088	21.8161	16.2312	25.0255	18.6261	19.8095	19.528	15.9013	16.9039	11.9782	6.52439	6.55283	7.36509	4.94095	5.3692	6.6462	5.15537	4.91953	3.58846	9.21129	19.428	21.3289	20.6934	16.8262	11.9036	14.0161	19.1697	14.219	9.23937
9	9.60093	11.3286	8.43274	9.74292	7.83781	8.0854	6.87928	7.33407	7.98656	7.92935	8.9584	18.5038	8.19216	12.4003	14.4206	16.8624	6.87942	12.4384	12.5218	9.85681	23.7888	21.0191	15.81	24.4735	17.298	19.2397	18.3332	15.9159	16.242	11.5045	6.32393	6.04441	6.39281	4.70699	5.12905	4.791	4.20037	4.82848	3.1643	10.0559	19.166	21.2217	20.3291	15.1834	11.5794	13.587	18.9975	13.5145	8.96059
10	10.0365	10.4227	8.13841	9.12746	7.36928	7.37366	6.50717	6.75018	7.22243	7.15292	8.79142	18.0201	8.48125	12.1539	13.744	16.4421	6.88367	11.6297	11.7653	9.43403	22.5092	19.4719	14.3391	22.6054	15.5289	17.8751	17.1808	14.4555	15.5636	10.298	6.32208	5.35591	5.73409	3.89495	5.38117	4.16957	4.51208	4.95447	2.70393	10.6384	17.8583	19.9827	19.8473	15.0429	11.4456	13.126	18.6346	13.3174	9.26321
11	8.43255	9.84435	7.59277	8.11114	6.32151	7.55573	6.15695	6.62939	6.84662	6.63807	8.14366	17.2231	7.91982	11.1398	13.0859	15.2147	6.45214	11.0327	12.4371	8.90294	20.5453	18.6839	13.1782	20.1697	14.7743	16.4494	15.6791	13.8027	13.8287	9.61001	5.45174	4.32639	5.32465	3.67108	3.59139	4.05692	4.18454	4.09491	2.70382	9.10867	17.2337	18.7869	18.3277	14.4634	10.4544	12.4278	17.694	11.7616	8.16699
12	2.84038	1.8356	1.35593	1.70922	1.93816	1.59979	0.970682	0.98522	0.925986	1.27901	1.50405	2.577	0.923204	2.41979	2.86028	2.55817	0.803283	1.7407	2.34152	1.45182	4.22849	1.99071	1.53208	2.07007	1.82223	2.50123	1.87042	2.10253	2.43938	0.733417	1.18925	0.423082	0.272252	0.582119	-0.6986837*	0.817261	0.927769	1.51779	0.299677	2.80929	4.68424	2.65246	2.99167	1.59664	1.91043	1.73576	2.73911	1.75167	1.54987
13	1.88893	1.05631	1.00884	1.41001	1.15997	0.895555	0.837515	1.29357	0.727931	1.17328	1.45708	2.79088	0.376847	2.49165	2.212	2.49193	0.674413	1.09122	2.05562	1.13315	4.19078	1.90183	1.12126	0.912554	1.67689	2.2401	1.32362	1.53213	2.2046	0.408194	0.821276	0.170266	0.222252	0.112101	-1.423492*	0.65401	1.20523	1.28768	-0.1240161*	2.36682	3.34105	3.08698	2.16456	1.7725	2.15179	1.76266	2.76496	1.42521	1.37786
14	2.37083	1.26207	1.72078	2.06848	1.37427	0.735356	0.809038	1.32257	0.820974	1.19133	1.289	2.38198	1.0615	2.47901	2.17369	2.73084	0.802734	1.63156	2.10321	0.890178	3.8419	1.6997	0.669725	1.76037	0.879282	2.00653	1.17477	1.45353	1.9829	0.489511	1.67237	0.0132921	-0.03661874*	0.422352	-0.7660693*	0.475019	0.626978	1.8528	0.172825	2.12022	3.21839	2.86873	3.03458	1.74694	1.95243	1.88031	2.71614	1.56524	1.56323
[truncated: 11 more columns]

## Sheet: Figure 4 - figure supplement 2c
Figure 4 - figure supplement 2c Kaplan-Meier survival analysis of KP (n = 8) and KPG3 (n = 9) mice.
Genotype	Mouse ID	Days elapsed	KP	KPG1
KP	EME-019820	178	1
	EME-019849	177	1
	EME-019821	178	1
	EME-019822	167	1
	EME-019823	167	1
	EME-019824	154	1
	EME-019827	196	1
	EME-019850	162	1
KPG3	EME-019894	167		1
	EME-019897	175		1
	EME-019893	167		1
	EME-019895	191		1
	EME-019795	203		1
	EME-019898	178		1
	EME-019899	161		1
	EME-019900	168		1
	EME-019901	131		1

## Sheet: Figure 4 - figure supplement 2d
Figure 4 - figure supplement 2d Percent of KP (n = 86) and KPG3 (n = 54) lesions classified by tumor grades, either detailed from alveolar hyperplasia (AH) to grade 5 or discriminated between alveolar hyperplasia and adenomas, and adenocarcinomas. Alveolar hyperplasia and adenomas include the AH and the tumor grades 1, 2, and 3. Adenocarcinomas contain the tumor grades 4 and 5.
Left part of the figure AH, Grade1, Grade 2, Grade 3, Grade 4, Grade 5										KP				KPG3
	Percent of [%]									Tumor number per tumor grade	% of tumor number	Tumor number per tumor grade	% of tumor number	Tumor number per tumor grade	% of tumor number	Tumor number per tumor grade	% of tumor number
	AH	Grade 1	Grade 2	Grade 3	Grade 4	Grade 5		Alveolar Hyperplasia & Adenoma	AH	8	9.30233	59	68.6047	4	7.40741	33	61.1111
KP	9	1	19	39	26	6			Grade 1	1	1.16279			0	0
KPG3	7	0	9	45	33	6			Grade 2	16	18.6047			5	9.25926
									Grade 3	34	39.5349			24	44.4444
Right part of the figure Alveolar Hyperplasia & Adenoma (AH, Grade1, Grade 2, Grade 3) and Adenocarcinoma (Grade 4, Grade 5)								Adenocarcinoma	Grade 4	22	25.5814	27	31.3953	18	33.3333	21	38.8889
	Percent of [%]								Grade 5	5	5.81395			3	5.55556
	Alveolar Hyperplasia & Adenoma	Adenocarcinoma							TOTAL	86	100	86	100	54	100	54	100
KP	69	31
KPG3	61	39
