# Supplementary material for: Combined deletion of Glut1 and Glut3 impairs lung adenocarcinoma growth
Source: eLife. 2020 Jun 23;9:e53618. doi: 10.7554/eLife.53618 (PMC7311173; doi:10.7554/eLife.53618)
Supplement: Figure 4—figure supplement 3—source data 1. [file elife-53618-fig4-figsupp3-data1.xlsx]

## Sheet: Figure 4 - figure supplement 3a
Figure 4 - figure supplement 3a Graph with mean ± s.e.m. shows the fold changes of KP and KPG1G3 tumor volumes (n = 32 and 20 tumors) monitored during 28 days by μCT, starting at 16 weeks and 6 days post-tumor initiation with tumor volumes set to 1.
Data relative to the μCT scan done on 23.07.19
μCT date	Days elapsed	KP																																KPG1G3
		T1	T2	T3	T4	T5	T6	T7	T8	T9	T10	T11	T12	T13	T14	T15	T16	T17	T18	T19	T20	T21	T22	T23	T24	T25	T26	T27	T28	T29	T30	T31	T32	T1	T2	T3	T4	T5	T6	T7	T8	T9	T10	T11	T12	T13	T14	T15	T16
2019-07-23	0	1	1	1	1	1	1	1	1	1	1	1	1	1	1	1	1	1	1	1	1	1	1	1	1	1	1	1	1	1	1	1	1	1	1	1	1	1	1	1	1	1	1	1	1	1	1	1	1
2019-08-05	13	2.25	2.57	1.87	2.3	1.5	2.4	2.37	10.18	2.06	1.53	1.73	4.12	2.06	2.82	3.53	2.79	4.5	1.72	4.09	1.22	1.82	2.21	2.85	1.74	1.6	2.15	2.85	1.56	3.28	4.45	1.65	2.43	1.88	1.34	1.56	2.1	2.32	1.65	3.45	1.35	2.04	2.37	1.91	1.85	1.73	5.98	2.21	2.28
2019-08-20	28	4.9	7	2.63	22.2	3.71	4.62	4.98	41.24	4.64	2.95	3.42	7.7	2.51	5.65	9.41	8.66	24.78	3.13	10.95	2.42	3.57	5.06	6.6	3.61	4.7	4.24	11.5	3.55	8.84	9.46	4.45	4.31	3.02	2.9	4.63	5.73	4.26	3.78	6.61	3.78	3.47	4.9	2.93	2.94	2.05	12.56	4.51	3.22
Tumor volume of each tumor
μCT date	Days elapsed	KP																																KPG1G3
		T1	T2	T3	T4	T5	T6	T7	T8	T9	T10	T11	T12	T13	T14	T15	T16	T17	T18	T19	T20	T21	T22	T23	T24	T25	T26	T27	T28	T29	T30	T31	T32	T1	T2	T3	T4	T5	T6	T7	T8	T9	T10	T11	T12	T13	T14	T15	T16
2019-07-23	0	0.1054	0.4379	0.2985	0.7073	0.1581	0.1678	0.096	0.0985	0.536	1.4884	0.8933	0.087	0.2166	0.0762	0.3479	1.883	0.1218	0.3899	0.4521	0.4662	6.9718	1.4786	0.6974	5.8135	0.2499	1.4683	0.7678	0.4055	0.6599	0.4837	0.6923	0.6162	0.9253	0.3155	0.8853	0.7708	0.3465	0.1437	0.1477	0.2488	1.3989	0.5438	5.596	1.7605	0.8958	0.102	7.8777	0.6356
2019-08-05	13	0.237	1.1235	0.558	1.6286	0.2371	0.4026	0.2274	1.0027	1.1066	2.2836	1.5464	0.3586	0.4458	0.2151	1.2273	5.2566	0.5477	0.6723	1.8469	0.5672	12.7	3.268	1.9846	10.1	0.4009	3.1583	2.1851	0.6328	2.1649	2.1541	1.145	1.4995	1.739	0.4233	1.3799	1.6179	0.8054	0.2377	0.5097	0.3351	2.8601	1.2877	10.7	3.2527	1.5505	0.6099	17.4	1.447
2019-08-20	28	0.5164	3.0634	0.7848	15.7	0.5863	0.7751	0.4784	4.062	2.4861	4.3925	3.0539	0.6699	0.5441	0.4304	3.2734	16.3	3.0177	1.2193	4.951	1.1278	24.9	7.4887	4.6018	21	1.174	6.2276	8.8326	1.4387	5.8347	4.5741	3.0794	2.6572	2.7987	0.9142	4.1028	4.4192	1.4775	0.5433	0.977	0.9412	4.8604	2.6641	16.4	5.1677	1.8366	1.2813	35.5	2.0478
[truncated: 4 more columns]
