# Supplementary material for: Combined deletion of Glut1 and Glut3 impairs lung adenocarcinoma growth
Source: eLife. 2020 Jun 23;9:e53618. doi: 10.7554/eLife.53618 (PMC7311173; doi:10.7554/eLife.53618)
Supplement: Figure 4—source data 1. [file elife-53618-fig4-data1.xlsx]

## Sheet: Figure 4c
Figure 4c Graph with mean ± s.e.m. shows the fold changes of KP and KPG1G3 tumor volumes (n = 8 and 9 tumors) monitored during 43 days by μCT, starting at 15 weeks and 2 days post-tumor initiation with tumor volumes set to 1.
Data relative to the μCT scan done on 25.04.19
μCT date	Days elapsed	KP								KPG1G3
		T1	T2	T3	T4	T5	T6	T7	T8	T1	T2	T3	T4	T5	T6	T7	T8	T9
2019-04-25	0	1	1	1	1	1	1	1	1	1	1	1	1	1	1	1	1	1
2019-05-06	11	1.67	2.58	1.94	2.04	1.8	1.62	1.78	7.14	1.17	1.33	1.14	2.69	1.18	3.27	1.69	1.16	1.21
2019-06-07	43	25.78	18.75	5.29	8.09	8.41	7.32	4.74	20.71	2.44	8.5	1.8	17.69	3.48	4.2	2.77	3.4	1.97
Tumor volume of each tumor
μCT date	Days elapsed	KP								KPG1G3
		T1	T2	T3	T4	T5	T6	T7	T8	T1	T2	T3	T4	T5	T6	T7	T8	T9
2019-04-25	0	0.27	0.12	0.62	0.23	0.75	0.6	0.23	0.14	0.41	0.18	5.61	0.16	0.33	0.15	0.35	0.57	1.41
2019-05-06	11	0.45	0.31	1.2	0.47	1.35	0.97	0.41	1	0.48	0.24	6.37	0.43	0.39	0.49	0.59	0.66	1.71
2019-06-07	43	6.96	2.25	3.28	1.86	6.31	4.39	1.09	2.9	1	1.53	10.1	2.83	1.15	0.63	0.97	1.94	2.78

## Sheet: Figure 4f
Figure 4f Percent of KP (n = 150) and KPG1G3 (n = 170) lesions classified by tumor grades, either detailed from alveolar hyperplasia (AH) to grade 5 or discriminated between alveolar hyperplasia and adenomas, and adenocarcinomas. Alveolar hyperplasia and adenomas include the AH and the tumor grades 1, 2, and 3. Adenocarcinomas contain the tumor grades 4 and 5.
Left part of the figure AH, Grade1, Grade 2, Grade 3, Grade 4, Grade 5										KP				KPG1G3
	Percent of [%]									Tumor number per tumor grade	% of tumor number	Tumor number per tumor grade	% of tumor number	Tumor number per tumor grade	% of tumor number	Tumor number per tumor grade	% of tumor number
	AH	Grade 1	Grade 2	Grade 3	Grade 4	Grade 5		Alveolar Hyperplasia & Adenoma	AH	12	8	87	58	25	14.7059	120	70.5882
KP	8	1	17	32	41	1			Grade 1	2	1.33333			14	8.23529
KPG1G3	15	8	17	31	29	0			Grade 2	25	16.6667			28	16.4706
									Grade 3	48	32			53	31.1765
Right part of the figure Alveolar Hyperplasia & Adenoma (AH, Grade1, Grade 2, Grade 3) and Adenocarcinoma (Grade 4, Grade 5)								Adenocarcinoma	Grade 4	61	40.6667	63	42	50	29.4118	50	29.4118
	Percent of [%]								Grade 5	2	1.33333			0	0
	Alveolar Hyperplasia & Adenoma	Adenocarcinoma							TOTAL	150	100	150	100	170	100	170	100
KP	58	42
KPG1G3	71	29

## Sheet: Figure 4g
Figure 4g Kaplan-Meier survival analysis of KP (n = 8) and KPG1G3 (n = 6) mice.
Genotype	Mouse ID	Days elapsed	KP	KPG1
KP	EME-019820	178	1
	EME-019849	177	1
	EME-019821	178	1
	EME-019822	167	1
	EME-019823	167	1
	EME-019824	154	1
	EME-019827	196	1
	EME-019850	162	1
KPG1G3	EME-019796	167		1
	EME-019980	232		0
	EME-019981	232		1
	EME-019982	191		1
	EME-019797	191		1
	EME-019984	232		0
